# Supplementary material
Source: Research Square preprint supplement (doi:10.21203/rs.3.rs-9955921/v1)
Supplement: Supplementary file 2 [file c210a010e9b8eb21aaf5049f.docx]

**Supplementary Information** is available for this paper.
